# Supplementary material for: Agonistic anti-DCIR antibody inhibits ITAM-mediated inflammatory signaling and promotes immune resolution
Source: PubMed Central journal article supplement (PMC11383175; doi:10.1172/jci.insight.176064), 2024-05-23

Westernblot for Figure 2B

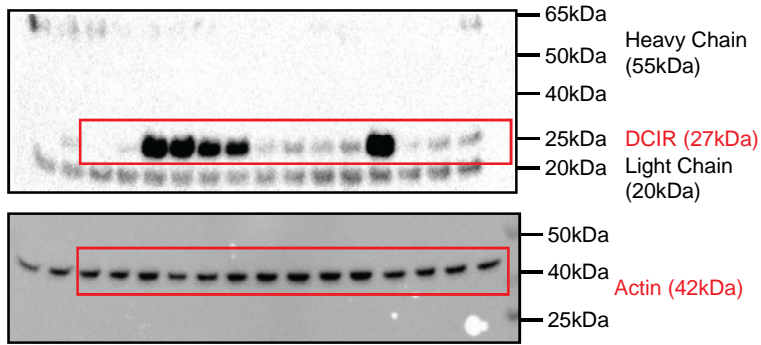

Westernblot for Figure 2C

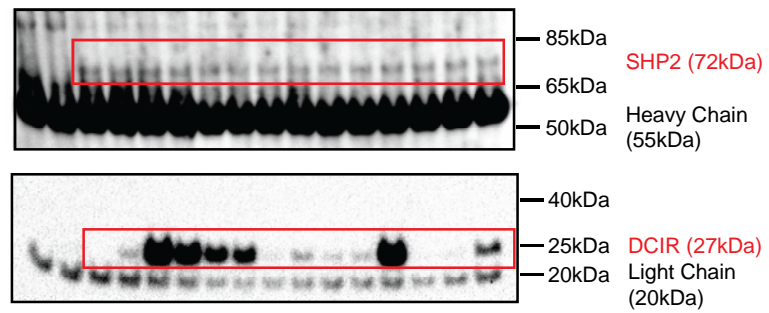

Westernblot for Figure 3C

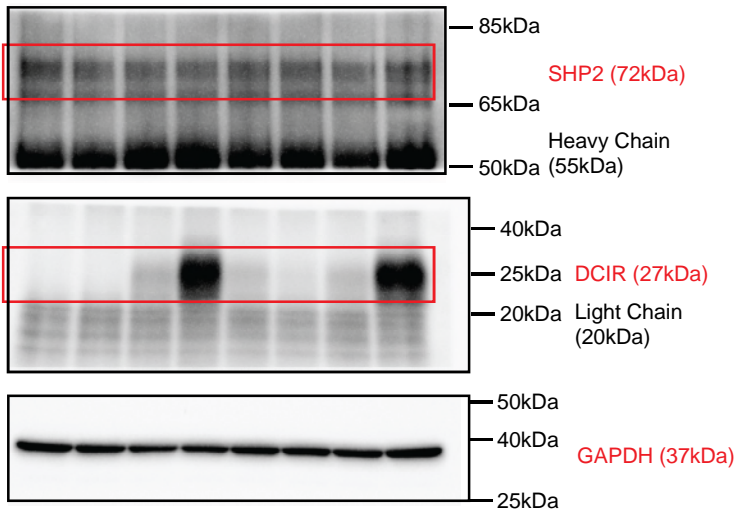

Westernblot for Figure 3D

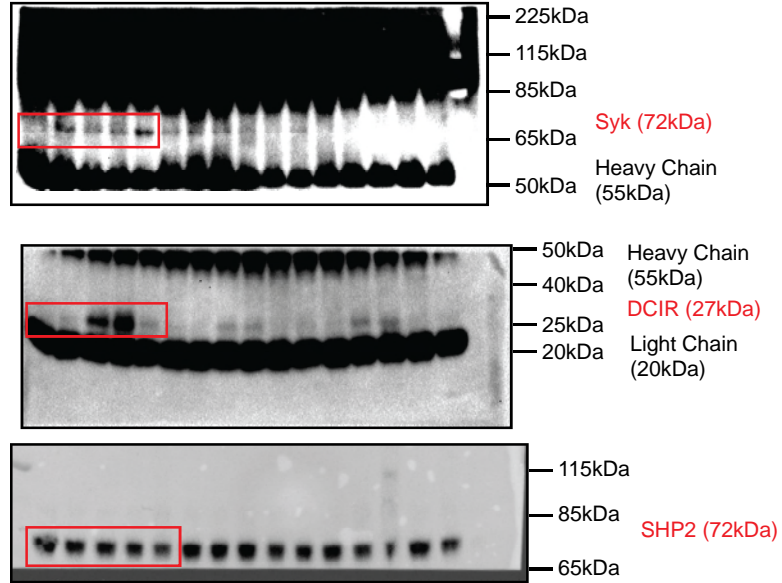

Westernblot for Figure 3E

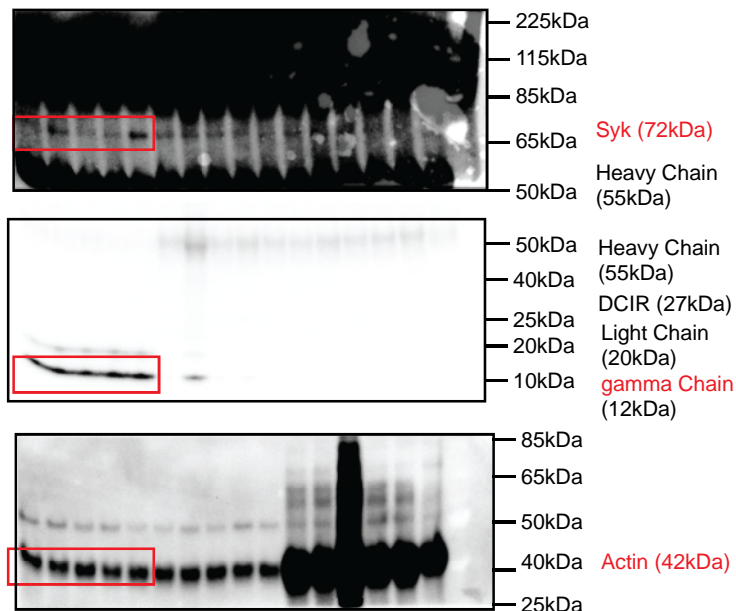

Westernblot for Supplementary Figure 4E

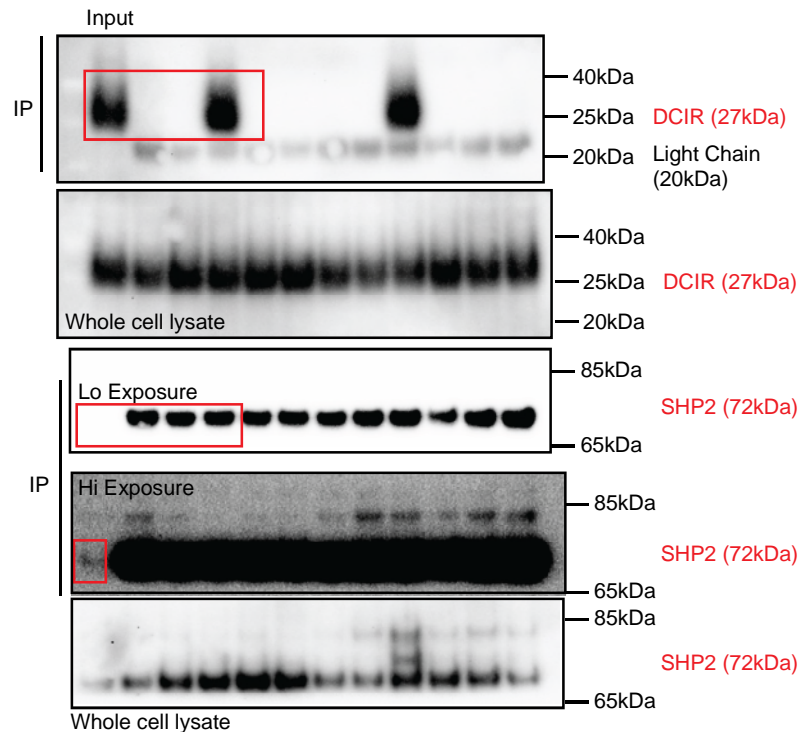

Supplement: jciinsight-9-176064-s072.pdf [file jciinsight-9-176064-s072.pdf]
